# Supplementary material for: Manganese(II) Bromide Compound with Diprotonated 1-Hydroxy-2-(pyridin-2-yl)-4,5,6,7-tetrahydrobenzimidazole: Dual Emission and the Effect of Proton Transfers
Source: MDPI journal article supplement (doi:10.3390/inorganics10120245), 2022-12-06
Supplement: s1 [file s1]

**Table S1.** Crystal data and structure refinement details for **1**.

|                                             |                                                                                 |
|---------------------------------------------|---------------------------------------------------------------------------------|
| Empirical formula                           | C <sub>12</sub> H <sub>17</sub> Br <sub>4</sub> MnN <sub>3</sub> O <sub>2</sub> |
| Formula weight                              | 609.86                                                                          |
| Temperature/K                               | 150.00                                                                          |
| Crystal system                              | monoclinic                                                                      |
| Space group                                 | P2 <sub>1</sub> /c                                                              |
| a/Å                                         | 16.6627(4)                                                                      |
| b/Å                                         | 7.8392(2)                                                                       |
| c/Å                                         | 15.8449(4)                                                                      |
| α/°                                         | 90                                                                              |
| β/°                                         | 108.6470(10)                                                                    |
| γ/°                                         | 90                                                                              |
| Volume/Å <sup>3</sup>                       | 1961.05(9)                                                                      |
| Z                                           | 4                                                                               |
| ρ <sub>calc</sub> /g/cm <sup>3</sup>        | 2.066                                                                           |
| μ/mm <sup>-1</sup>                          | 8.830                                                                           |
| F(000)                                      | 1164.0                                                                          |
| Crystal size/mm <sup>3</sup>                | 0.14 × 0.1 × 0.08                                                               |
| Radiation                                   | MoKα (λ = 0.71073)                                                              |
| 2Θ range for data collection/°              | 5.16 to 61.078                                                                  |
| Index ranges                                | -23 ≤ h ≤ 23, -11 ≤ k ≤ 11, -22 ≤ l ≤ 19                                        |
| Reflections collected                       | 27218                                                                           |
| Independent reflections                     | 5998 [R <sub>int</sub> = 0.0409, R <sub>sigma</sub> = 0.0370]                   |
| Data/restraints/parameters                  | 5998/2/208                                                                      |
| Goodness-of-fit on F <sup>2</sup>           | 1.060                                                                           |
| Final R indexes [I ≥ 2σ (I)]                | R <sub>1</sub> = 0.0268, wR <sub>2</sub> = 0.0503                               |
| Final R indexes [all data]                  | R <sub>1</sub> = 0.0418, wR <sub>2</sub> = 0.0536                               |
| Largest diff. peak/hole / e Å <sup>-3</sup> | 0.53/-0.47                                                                      |

**Table S2.** Fractional Atomic Coordinates (×10<sup>4</sup>) and Equivalent Isotropic Displacement Parameters (Å<sup>2</sup>×10<sup>3</sup>) for **1**. U<sub>eq</sub> is defined as 1/3 of the trace of the orthogonalised U<sub>ij</sub> tensor.

| Atom | x           | y          | z          | U(eq)    |
|------|-------------|------------|------------|----------|
| Br4  | 6696.2(2)   | 9862.5(2)  | 9102.9(2)  | 23.62(6) |
| Br3  | 7269.3(2)   | 5058.7(3)  | 9633.3(2)  | 27.67(6) |
| Br1  | 8555.3(2)   | 8056.0(3)  | 8229.2(2)  | 30.01(6) |
| Br2  | 6147.4(2)   | 6546.6(3)  | 6995.6(2)  | 36.39(7) |
| Mn1  | 7192.8(2)   | 7250.1(4)  | 8462.7(2)  | 21.58(8) |
| O1   | 7951.8(10)  | 3719.2(19) | 6058.8(10) | 27.2(4)  |
| O2   | 8105.0(13)  | 6890(2)    | 6157.0(12) | 34.1(4)  |
| N1   | 8006.3(11)  | 3262(2)    | 6913.0(11) | 20.4(4)  |
| N2   | 7659.4(12)  | 2261(2)    | 8001.1(12) | 23.1(4)  |
| N3   | 6284.8(11)  | 2809(2)    | 5685.4(11) | 21.6(4)  |
| C1   | 7353.7(14)  | 2606(2)    | 7121.4(14) | 19.8(4)  |
| C8   | 6493.8(13)  | 2335(2)    | 6547.5(13) | 19.3(4)  |
| C9   | 5869.6(15)  | 1636(3)    | 6839.9(15) | 28.0(5)  |
| C11  | 4862.3(14)  | 1999(3)    | 5384.7(15) | 26.8(5)  |
| C3   | 8721.5(14)  | 3335(3)    | 7634.7(14) | 22.2(4)  |
| C2   | 8498.8(14)  | 2690(3)    | 8325.9(14) | 23.9(5)  |
| C12  | 5496.9(14)  | 2661(3)    | 5111.0(15) | 25.9(5)  |
| C4   | 9569.7(14)  | 3983(3)    | 7677.0(16) | 29.4(5)  |
| C10  | 5054.2(15)  | 1468(3)    | 6259.3(15) | 31.2(5)  |
| C5   | 10094.6(15) | 4183(3)    | 8662.4(17) | 36.8(6)  |

|    |            |         |            |         |
|----|------------|---------|------------|---------|
| C7 | 9080.4(15) | 2496(3) | 9252.3(15) | 33.2(6) |
| C6 | 9990.8(16) | 2667(3) | 9228.7(17) | 37.8(6) |

**Table S3.** Anisotropic Displacement Parameters ( $\text{\AA}^2 \times 10^3$ ) for **1**. The Anisotropic displacement factor exponent takes the form:  $-2\pi^2[h^2a^{*2}U_{11}+2hka^*b^*U_{12}+\dots]$ .

| Atom | U <sub>11</sub> | U <sub>22</sub> | U <sub>33</sub> | U <sub>23</sub> | U <sub>13</sub> | U <sub>12</sub> |
|------|-----------------|-----------------|-----------------|-----------------|-----------------|-----------------|
| Br4  | 32.83(13)       | 21.74(10)       | 19.73(11)       | 0.28(8)         | 13.23(10)       | 4.57(9)         |
| Br3  | 33.66(14)       | 21.96(10)       | 29.15(13)       | 4.45(9)         | 12.51(11)       | 4.13(9)         |
| Br1  | 25.13(13)       | 37.27(13)       | 29.97(13)       | -3.58(10)       | 12.06(10)       | 2.5(1)          |
| Br2  | 38.50(15)       | 39.21(13)       | 23.42(13)       | -7.69(10)       | -1.38(11)       | 4.82(11)        |
| Mn1  | 24.10(18)       | 22.33(15)       | 18.50(17)       | -0.91(12)       | 7.09(14)        | 3.29(14)        |
| O1   | 30.6(9)         | 31.6(8)         | 21.4(8)         | 1.6(7)          | 11.2(7)         | -4.1(7)         |
| O2   | 41.5(11)        | 35.4(9)         | 25.4(10)        | 0.9(8)          | 10.6(9)         | -4.1(8)         |
| N1   | 22.2(10)        | 22.7(8)         | 16.9(9)         | 1.7(7)          | 7.3(8)          | 0.3(7)          |
| N2   | 24.4(10)        | 27.1(9)         | 19.3(9)         | 2.2(7)          | 9.2(8)          | 1.9(8)          |
| N3   | 20.9(10)        | 27.8(9)         | 17.8(9)         | 0.1(7)          | 8.4(8)          | -5.8(8)         |
| C1   | 21.3(11)        | 20.4(9)         | 18.3(10)        | 2.0(8)          | 7.0(9)          | 3.5(9)          |
| C8   | 20.2(11)        | 19.3(9)         | 19.0(10)        | 0.6(8)          | 6.8(9)          | 2.7(8)          |
| C9   | 24.8(12)        | 38.1(12)        | 21.6(12)        | 8.7(10)         | 8.1(10)         | 0.3(10)         |
| C11  | 19.1(12)        | 33.7(12)        | 25.4(12)        | -1.0(9)         | 3.8(10)         | -1.8(10)        |
| C3   | 19.1(11)        | 22.6(10)        | 24.0(11)        | -2.5(9)         | 5.6(9)          | 2.1(9)          |
| C2   | 23.8(12)        | 25.0(10)        | 20.1(11)        | -1.4(9)         | 2.9(9)          | 2.9(9)          |
| C12  | 22.5(12)        | 34.7(12)        | 17.9(11)        | -0.7(9)         | 2.6(9)          | -3.4(10)        |
| C4   | 21.3(12)        | 31.0(12)        | 36.1(14)        | 0.0(10)         | 9.3(10)         | 1.0(10)         |
| C10  | 21.4(12)        | 42.2(13)        | 31.7(13)        | 7.3(11)         | 10.9(10)        | -4.1(10)        |
| C5   | 21.3(13)        | 42.5(14)        | 39.3(15)        | -6.5(12)        | -0.8(11)        | 3.2(11)         |
| C7   | 30.7(14)        | 41.9(13)        | 22.6(12)        | -0.5(10)        | 2.5(11)         | 7.4(11)         |
| C6   | 29.6(14)        | 45.8(15)        | 30.3(14)        | -2.7(11)        | -1.3(11)        | 12.4(12)        |

**Table S4.** Bond Lengths for **1**.

| Atom | Atom | Length/\AA | Atom | Atom | Length/\AA |
|------|------|------------|------|------|------------|
| Br4  | Mn1  | 2.5386(4)  | C1   | C8   | 1.446(3)   |
| Br3  | Mn1  | 2.5012(4)  | C8   | C9   | 1.380(3)   |
| Br1  | Mn1  | 2.4955(4)  | C9   | C10  | 1.382(3)   |
| Br2  | Mn1  | 2.4805(4)  | C11  | C12  | 1.367(3)   |
| O1   | N1   | 1.375(2)   | C11  | C10  | 1.383(3)   |
| N1   | C1   | 1.336(3)   | C3   | C2   | 1.361(3)   |
| N1   | C3   | 1.364(3)   | C3   | C4   | 1.483(3)   |
| N2   | C1   | 1.350(3)   | C2   | C7   | 1.486(3)   |
| N2   | C2   | 1.369(3)   | C4   | C5   | 1.534(3)   |
| N3   | C8   | 1.350(3)   | C5   | C6   | 1.532(4)   |
| N3   | C12  | 1.342(3)   | C7   | C6   | 1.535(3)   |

**Table S5.** Bond Angles for **1**.

| Atom | Atom | Atom | Angle/°     | Atom | Atom | Atom | Angle/°    |
|------|------|------|-------------|------|------|------|------------|
| Br3  | Mn1  | Br4  | 101.749(13) | C9   | C8   | C1   | 123.28(19) |
| Br1  | Mn1  | Br4  | 106.455(14) | C8   | C9   | C10  | 120.0(2)   |
| Br1  | Mn1  | Br3  | 116.791(15) | C12  | C11  | C10  | 118.5(2)   |
| Br2  | Mn1  | Br4  | 109.443(14) | N1   | C3   | C4   | 128.1(2)   |
| Br2  | Mn1  | Br3  | 113.342(15) | C2   | C3   | N1   | 105.6(2)   |
| Br2  | Mn1  | Br1  | 108.475(15) | C2   | C3   | C4   | 126.3(2)   |
| C1   | N1   | O1   | 122.74(18)  | N2   | C2   | C7   | 127.7(2)   |
| C1   | N1   | C3   | 111.77(18)  | C3   | C2   | N2   | 107.30(19) |

|     |    |    |            |    |     |     |            |
|-----|----|----|------------|----|-----|-----|------------|
| C3  | N1 | O1 | 125.43(18) | C3 | C2  | C7  | 125.0(2)   |
| C1  | N2 | C2 | 109.99(18) | N3 | C12 | C11 | 120.4(2)   |
| C12 | N3 | C8 | 122.85(19) | C3 | C4  | C5  | 107.81(19) |
| N1  | C1 | N2 | 105.31(18) | C9 | C10 | C11 | 120.1(2)   |
| N1  | C1 | C8 | 128.47(19) | C6 | C5  | C4  | 112.5(2)   |
| N2  | C1 | C8 | 126.21(19) | C2 | C7  | C6  | 107.7(2)   |
| N3  | C8 | C1 | 118.62(19) | C5 | C6  | C7  | 112.3(2)   |
| N3  | C8 | C9 | 118.10(19) |    |     |     |            |

**Table S6.** Torsion Angles for **1**.

| A  | B  | C  | D   | Angle/°     | A   | B   | C   | D   | Angle/°     |
|----|----|----|-----|-------------|-----|-----|-----|-----|-------------|
| O1 | N1 | C1 | N2  | 177.54(17)  | C8  | N3  | C12 | C11 | -0.4(3)     |
| O1 | N1 | C1 | C8  | -3.5(3)     | C8  | C9  | C10 | C11 | 0.1(4)      |
| O1 | N1 | C3 | C2  | -177.07(17) | C3  | N1  | C1  | N2  | 0.4(2)      |
| O1 | N1 | C3 | C4  | 3.3(3)      | C3  | N1  | C1  | C8  | 179.39(19)  |
| N1 | C1 | C8 | N3  | -1.2(3)     | C3  | C2  | C7  | C6  | -15.4(3)    |
| N1 | C1 | C8 | C9  | 179.8(2)    | C3  | C4  | C5  | C6  | 43.2(3)     |
| N1 | C3 | C2 | N2  | -0.4(2)     | C2  | N2  | C1  | N1  | -0.6(2)     |
| N1 | C3 | C2 | C7  | 179.2(2)    | C2  | N2  | C1  | C8  | -179.65(19) |
| N1 | C3 | C4 | C5  | 166.9(2)    | C2  | C3  | C4  | C5  | -12.7(3)    |
| N2 | C1 | C8 | N3  | 177.59(19)  | C2  | C7  | C6  | C5  | 45.9(3)     |
| N2 | C1 | C8 | C9  | -1.4(3)     | C12 | N3  | C8  | C1  | -177.68(19) |
| N2 | C2 | C7 | C6  | 164.1(2)    | C12 | N3  | C8  | C9  | 1.4(3)      |
| N3 | C8 | C9 | C10 | -1.2(3)     | C12 | C11 | C10 | C9  | 1.0(4)      |
| C1 | N1 | C3 | C2  | 0.0(2)      | C4  | C3  | C2  | N2  | 179.31(19)  |
| C1 | N1 | C3 | C4  | -179.7(2)   | C4  | C3  | C2  | C7  | -1.1(4)     |
| C1 | N2 | C2 | C3  | 0.6(2)      | C4  | C5  | C6  | C7  | -63.9(3)    |
| C1 | N2 | C2 | C7  | -178.9(2)   | C10 | C11 | C12 | N3  | -0.8(3)     |
| C1 | C8 | C9 | C10 | 177.8(2)    |     |     |     |     |             |

**Table S7.** Hydrogen Atom Coordinates ( $\text{\AA} \times 10^4$ ) and Isotropic Displacement Parameters ( $\text{\AA}^2 \times 10^3$ ) for **1**.

| Atom | x        | y        | z        | U(eq)   |
|------|----------|----------|----------|---------|
| H1   | 7975.43  | 4786.25  | 6024.72  | 41      |
| H2   | 7362.73  | 1824.97  | 8319.12  | 28      |
| H3   | 6682.48  | 3233.56  | 5491.5   | 26      |
| H9   | 6000.44  | 1269.7   | 7440.38  | 34      |
| H11  | 4301.9   | 1905.47  | 4982.92  | 32      |
| H12  | 5379.53  | 3019.04  | 4510.78  | 31      |
| H4A  | 9515.35  | 5096.84  | 7368.89  | 35      |
| H4B  | 9849.75  | 3171.78  | 7382.24  | 35      |
| H10  | 4624.93  | 987.93   | 6461.31  | 37      |
| H5A  | 10700    | 4300.95  | 8713.59  | 44      |
| H5B  | 9919.39  | 5240.45  | 8897.25  | 44      |
| H7A  | 8999.29  | 1365.92  | 9491.91  | 40      |
| H7B  | 8963.8   | 3388.52  | 9639.57  | 40      |
| H6A  | 10380.5  | 2809.81  | 9844.15  | 45      |
| H6B  | 10150.8  | 1605.37  | 8984.08  | 45      |
| H2A  | 8130(20) | 7340(40) | 6645(12) | 82(12)  |
| H2B  | 7770(20) | 7590(40) | 5820(20) | 131(19) |

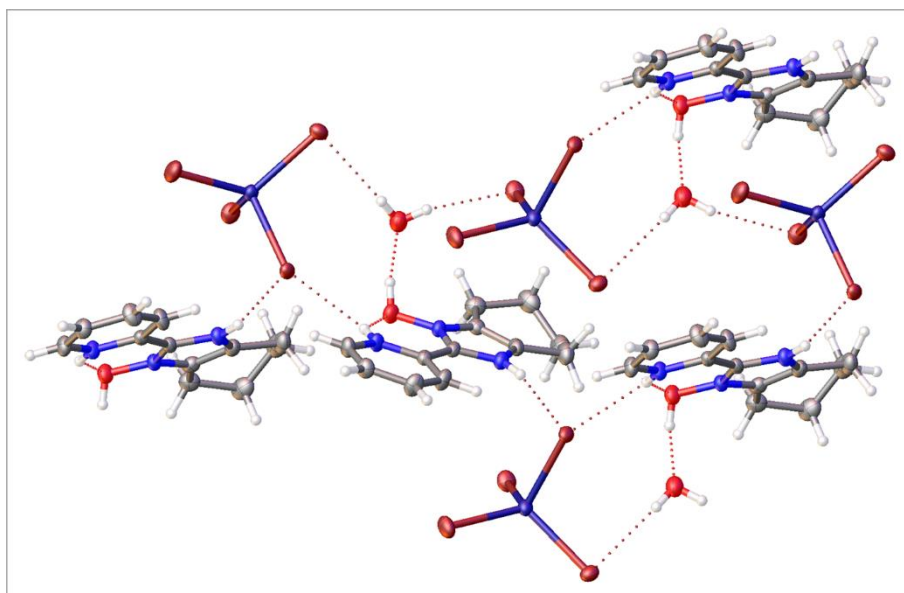

**Figure S1.** The structure of  $[\text{H}_3\text{L}][\text{MnBr}_4][\text{H}_2\text{O}]$  moiety of **1** with hydrogen bonds presented by red lines.

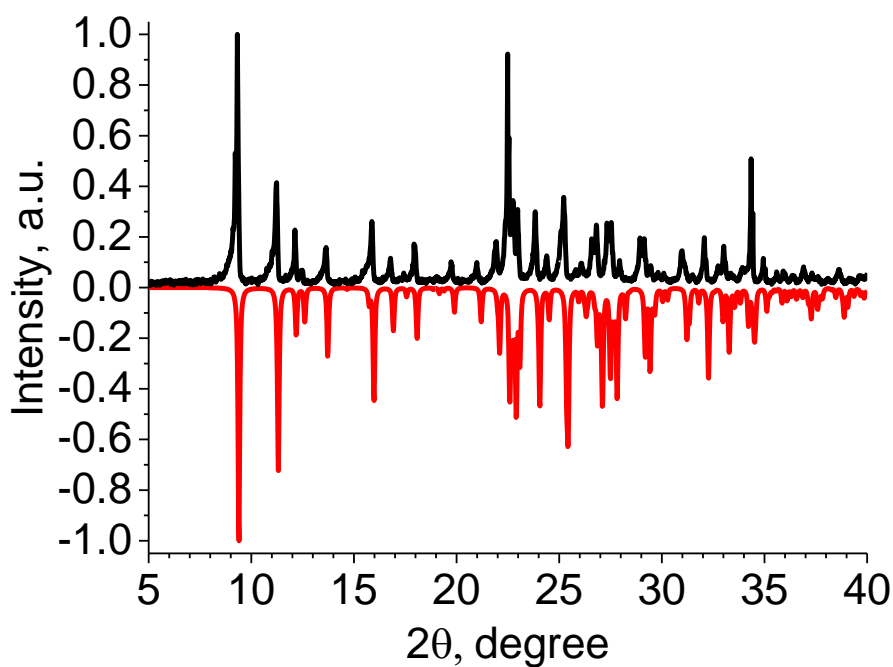

**Figure S2.** Comparison of experimental (black) XRPD patterns of **1** with the diffraction pattern, simulated for the crystal structure (red).

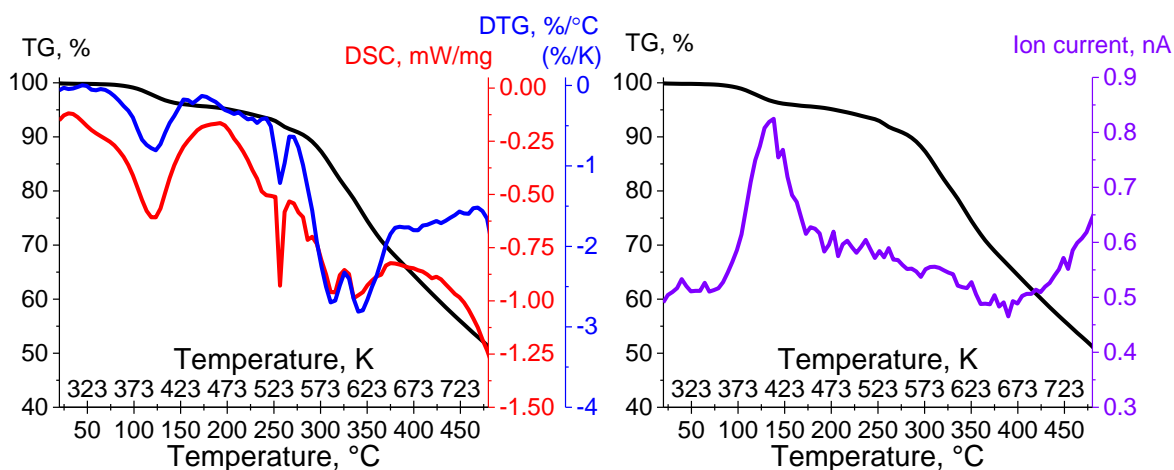

**Figure S3.** TG, DTG, and DSC curves (left) and TG with temperature dependence of the ion current of the mass spectrum at 18 Da (right) of **1**.

**Table S8.** TG, DTG, and DSC data of **1**.

| Stage | Temperature range, °C (K) | Peak temperature, °C (K) | Mass loss, % | Fragment loss    |
|-------|---------------------------|--------------------------|--------------|------------------|
| 1     | 80 – 150 (353 – 423)      | 120 (393)                | 3.5          | H <sub>2</sub> O |
| 2     | 200 – 370 (473 – 643)     | 310 (583) and 340 (613)  | 27           | HBr, HBr         |
| 3     | 370 – ... (643 – )        | –                        | –            |                  |

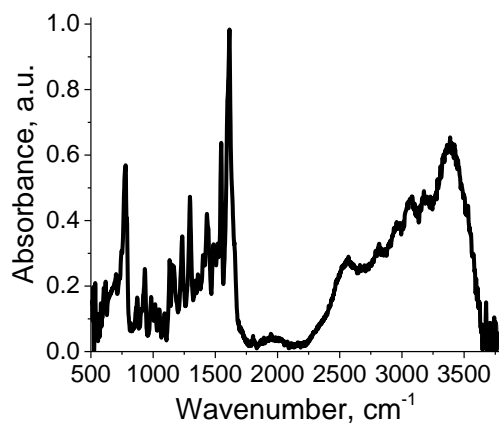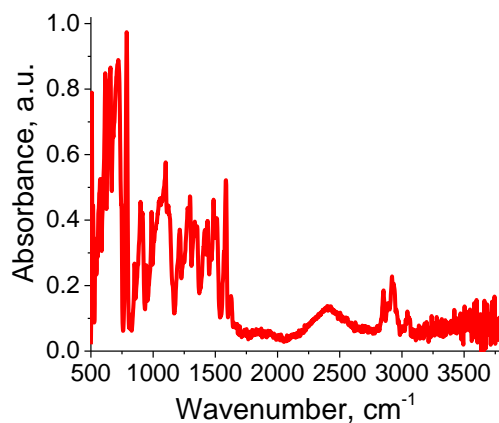**Figure S4.** Experimental IR spectrum of **1** (top) and HL (bottom).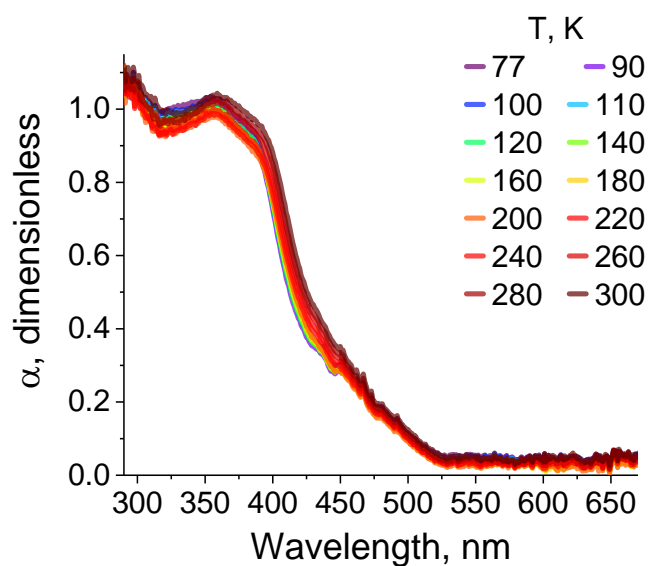**Figure S5.** Temperature dependence of the absorption plot of **1**.

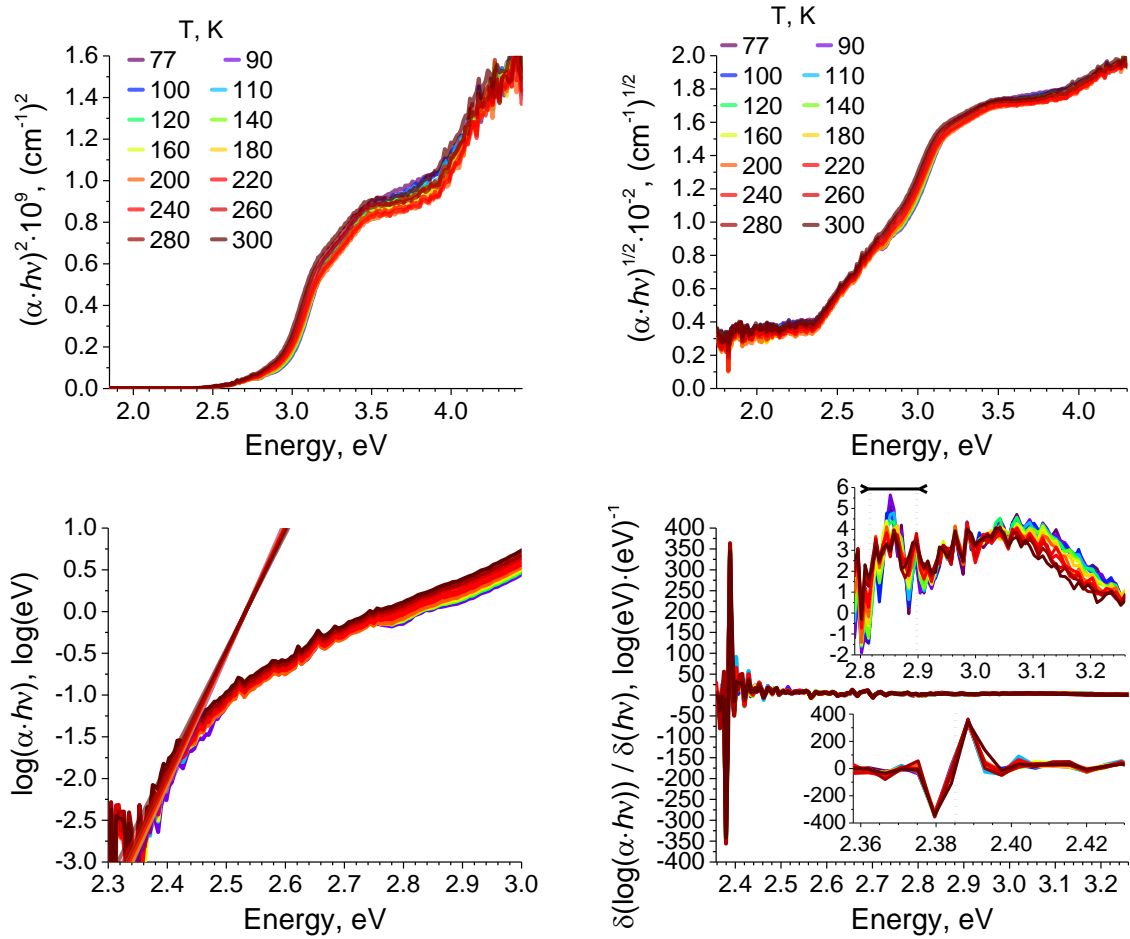

**Figure S6.** Temperature dependences of the Tauc plot of **1** (top). Temperature dependences of the  $\log(\alpha \cdot h\nu)$  (bottom, left) with linear approximation corresponding to the Urbach energy calculation. The analysis of the indirect band gap of **1**  $\frac{\delta(\log(\alpha \cdot h\nu))}{\delta(h\nu)}$  (bottom, right).

Footnote 1 for Figure S6. Spectrum near the onset of absorption can be described by the following equation:

$$\alpha \cdot h\nu = \alpha_0 \cdot \exp\left(\frac{h\nu - E_2^{indir}}{E_u}\right) \text{ or } \log(\alpha \cdot h\nu) = \log(\alpha_0) + \frac{h\nu - E_2^{indir}}{E_u}$$

where  $\alpha_0$  is a pre-exponential parameter,  $E_u$  is the temperature dependent Urbach Energy with  $E_u$  value for **1** increasing from 63 meV to 75 meV when temperature increase from 77 K to 300 K, and  $E_2^{indir}$  is the band-band transition energy  $E_2^{indir} \approx 2.54 \text{ meV}$ .

Footnote 2 for Figure S6. Absorption spectrum of the indirect band-band transition can be described by the following equation:

$$\alpha \cdot h\nu \sim \frac{(h\nu - E_2^{indir} - E_p^{indir})^2}{\exp\left(\frac{E_p^{indir}}{k_B \cdot T}\right) - 1} + \frac{(h\nu - E_2^{indir} + E_p^{indir})^2}{1 - \exp\left(-\frac{E_p^{indir}}{k_B \cdot T}\right)}$$

or

$$\log(\alpha \cdot h\nu) \sim \log\left(\frac{(h\nu - E_2^{indir} + E_p^{indir})^2}{\exp\left(\frac{E_p^{indir}}{k_B \cdot T}\right) - 1} + \frac{(h\nu - E_2^{indir} - E_p^{indir})^2}{1 - \exp\left(-\frac{E_p^{indir}}{k_B \cdot T}\right)}\right)$$

The derivative of the logarithm of the absorption spectrum equals to:

$$\frac{\delta(\log(\alpha \cdot h\nu))}{\delta(h\nu)} \sim \frac{\delta\left(\log\left(\frac{(h\nu - E_2^{indir} + E_p^{indir})^2}{\exp\left(\frac{E_p^{indir}}{k_B \cdot T}\right) - 1} + \frac{(h\nu - E_2^{indir} - E_p^{indir})^2}{1 - \exp\left(-\frac{E_p^{indir}}{k_B \cdot T}\right)}\right)\right)}{\delta(h\nu)}$$

$$\frac{\delta(\log(\alpha \cdot h\nu))}{\delta(h\nu)} \sim \frac{(1 - \exp\left(-\frac{E_p^{indir}}{k_B * T}\right))^{-1} (h\nu - E_2^{indir} - E_p^{indir}) + (\exp\left(\frac{E_p^{indir}}{k_B * T}\right) - 1)^{-1} (h\nu - E_2^{indir} + E_p^{indir})}{(1 - \exp\left(-\frac{E_p^{indir}}{k_B * T}\right))^{-1} (h\nu - E_2^{indir} - E_p^{indir})^2 + (\exp\left(\frac{E_p^{indir}}{k_B * T}\right) - 1)^{-1} (h\nu - E_2^{indir} + E_p^{indir})^2}$$

The derivative equals to zero ( $\frac{\delta(\log(\alpha \cdot h\nu))}{\delta(h\nu)} = 0$ ) at  $h\nu =$

$$\frac{(1 - \exp\left(-\frac{E_p^{indir}}{k_B * T}\right))^{-1} (E_2^{indir} + E_p^{indir}) + (\exp\left(\frac{E_p^{indir}}{k_B * T}\right) - 1)^{-1} (E_2^{indir} - E_p^{indir})}{(1 - \exp\left(-\frac{E_p^{indir}}{k_B * T}\right))^{-1} + (\exp\left(\frac{E_p^{indir}}{k_B * T}\right) - 1)^{-1}}.$$

For the  $E_p^{indir} \gg k_B * T$  ( $E_p^{indir} \gg 26$  meV) the equation can be simplified to:

$$h\nu = E_2^{indir} + E_p^{indir}.$$

Assuming  $E_p^{indir} = 0$ , the equation can be simplified to:

$$h\nu = E_2^{indir}.$$

If the Urbach Energy is not zero, the  $E_2^{indir}$  is equal to  $E_2^{indir} = \tilde{E}_2^{indir}|_{observed} + 2 * E_u$ . Taking into account the Urbach Energy, the numerical solve of equations gives following values of  $E_2^{indir}$  and  $E_p^{indir}$ :

$$h\nu = E_2^{indir} - 2 * E_u \rightarrow 2.39 \text{ eV} = E_2^{indir} - 2 * 0.075 \text{ eV} \rightarrow E_2^{indir} = 2.54 \text{ eV} \text{ and}$$

$$h\nu = E_2^{indir} + E_p^{indir} \rightarrow 2.85 \text{ eV} = 2.54 \text{ eV} + E_p^{indir} \rightarrow E_p^{indir} = 0.31 \text{ eV}.$$

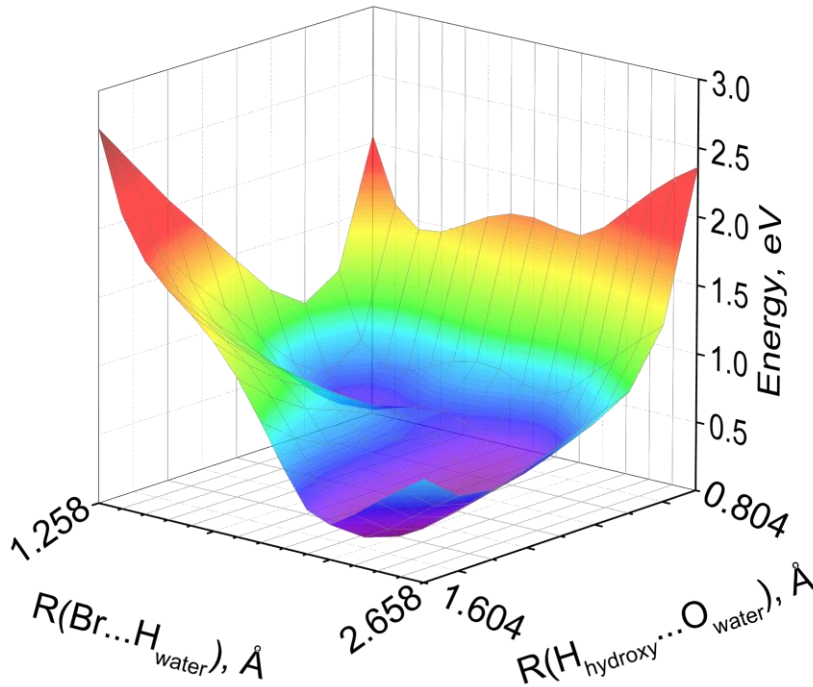

**Figure S7.** Calculated ground state potential energy surface of **1**.

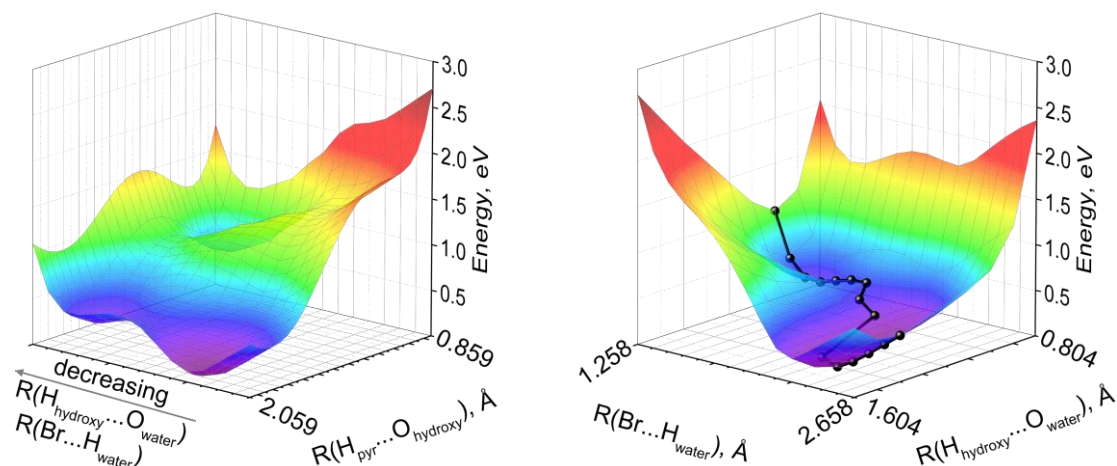

**Figure S8.** Calculated ground state potential energy surface along the  $\text{H}_{\text{pyr}}\cdots\text{O}_{\text{hydroxy}}$  distance changing corresponding the keto-enol tautomerization (left) and calculated ground state potential energy surface along the  $\text{Br}\cdots\text{H}_{\text{water}}$  and  $\text{H}_{\text{hydroxy}}\cdots\text{O}_{\text{water}}$  distance changing (right) showing the path for calculated keto-enol tautomerization energy potential surface of **1**.

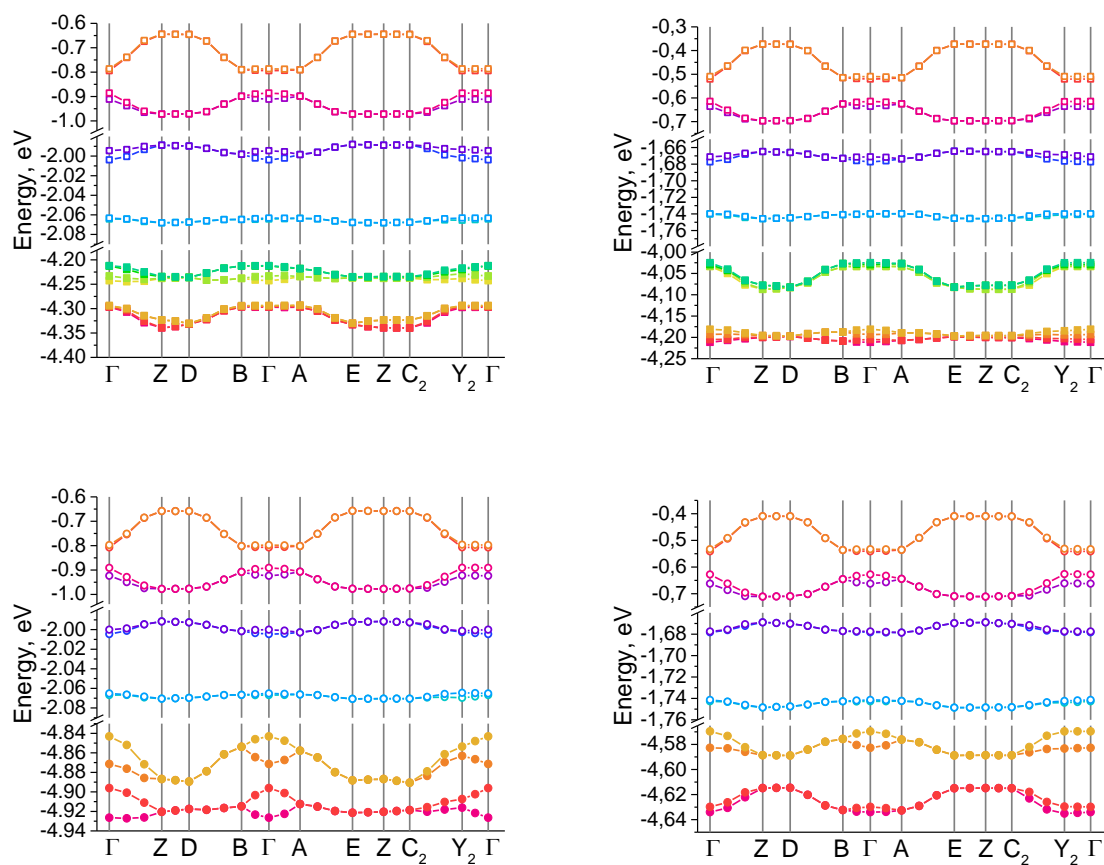

**Figure S9.** Calculated band structure for spin-up (top) and spin-down (bottom) of **1** in global (left) and local (right) minima.



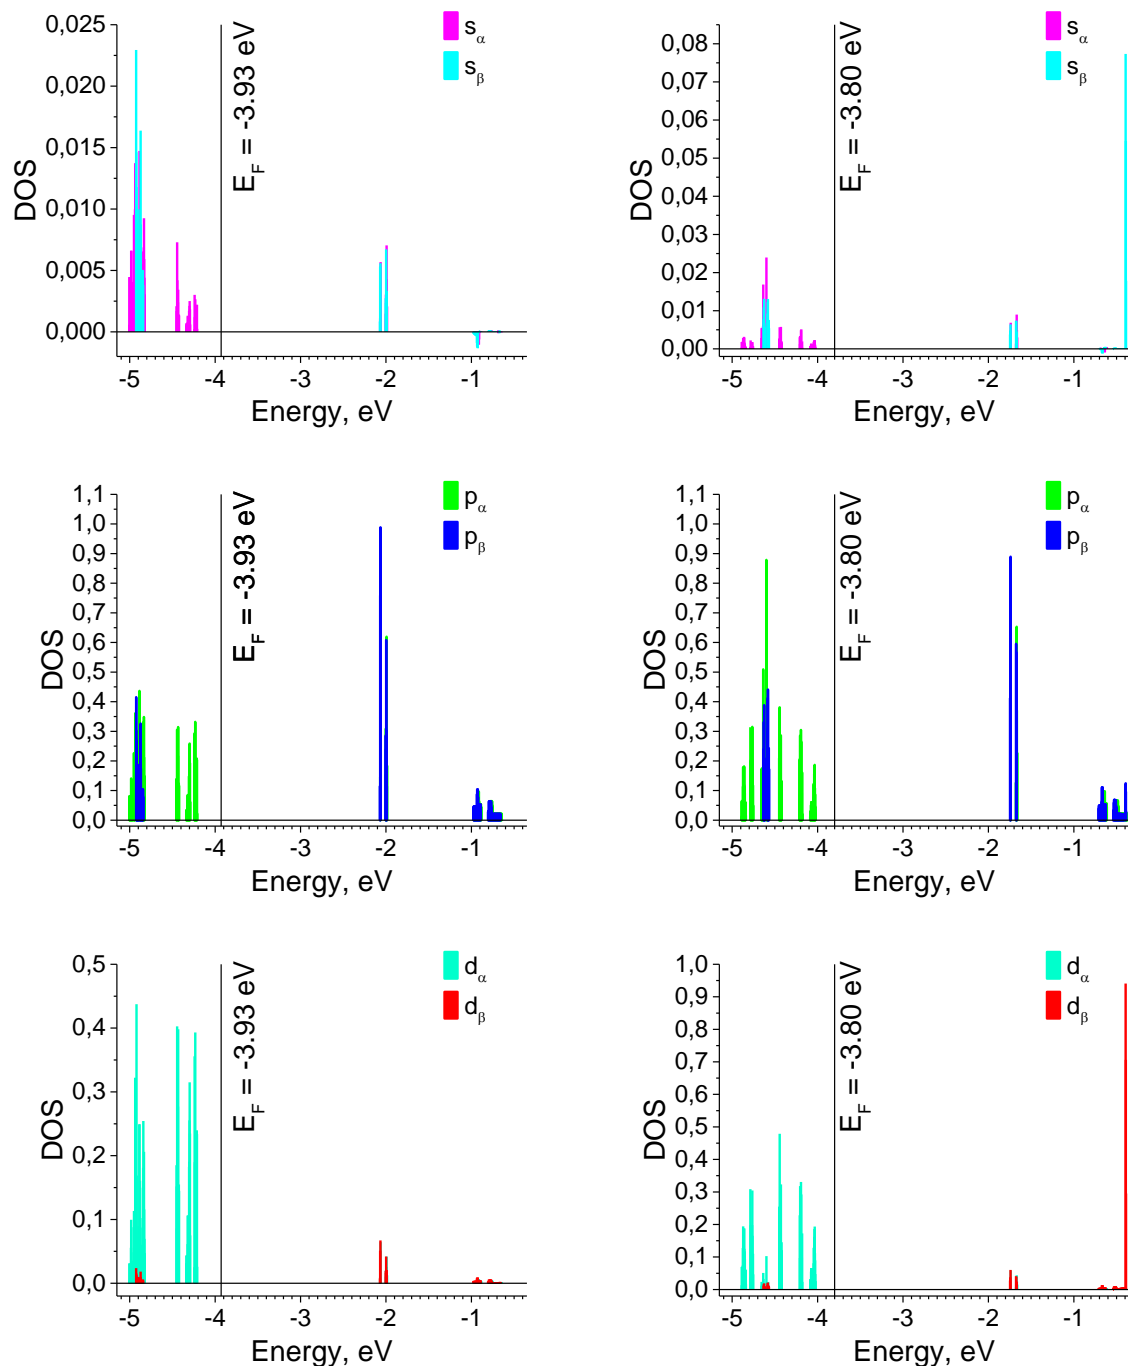

**Figure S10.** Calculated spin-up ( $\alpha$ ) and spin-down ( $\beta$ ) DOS of **1** in global (left) and local (right) minima.

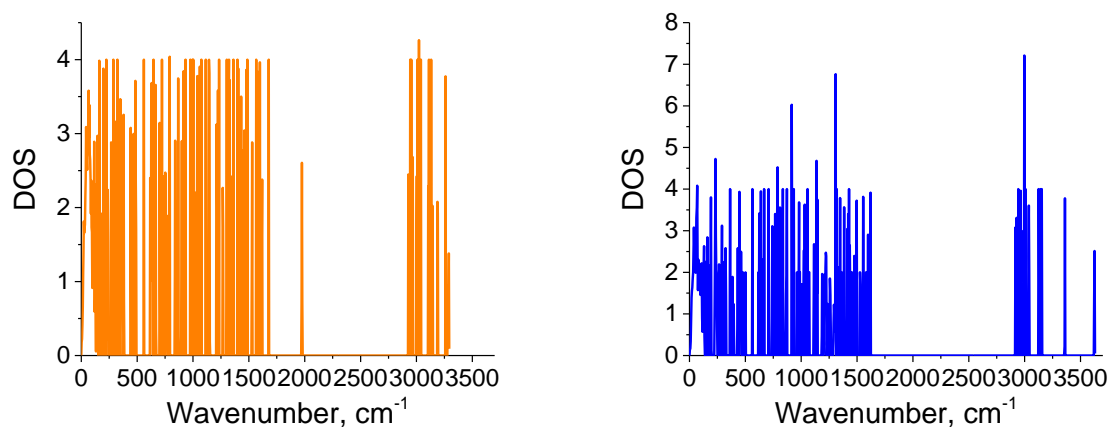

**Figure S11.** Calculated phonon energies of **1** in global (orange) and local (blue) minima.

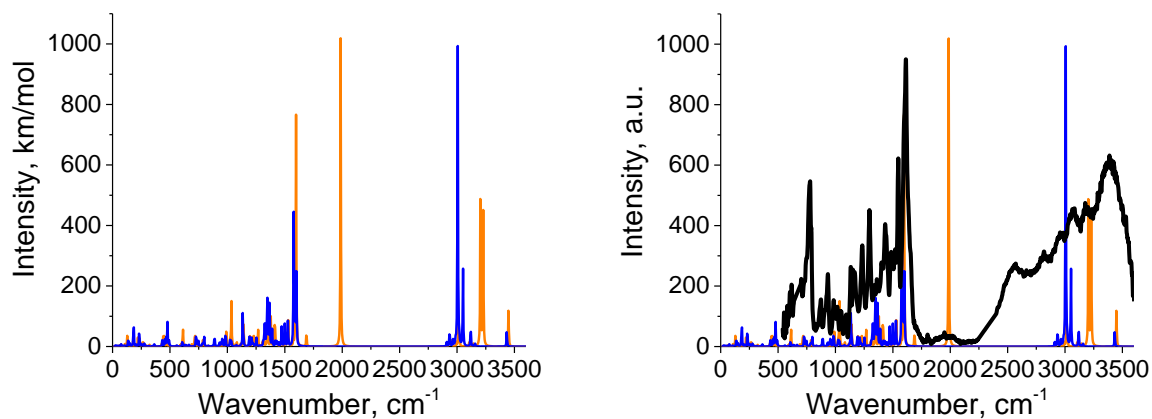

**Figure S12.** Calculated IR spectra of  $[\text{H}_3\text{L}][\text{MnBr}_4][\text{H}_2\text{O}]$  fragments of **1** in global (orange) and local (blue) minima (left) and comparison with the experimental IR spectrum (right).

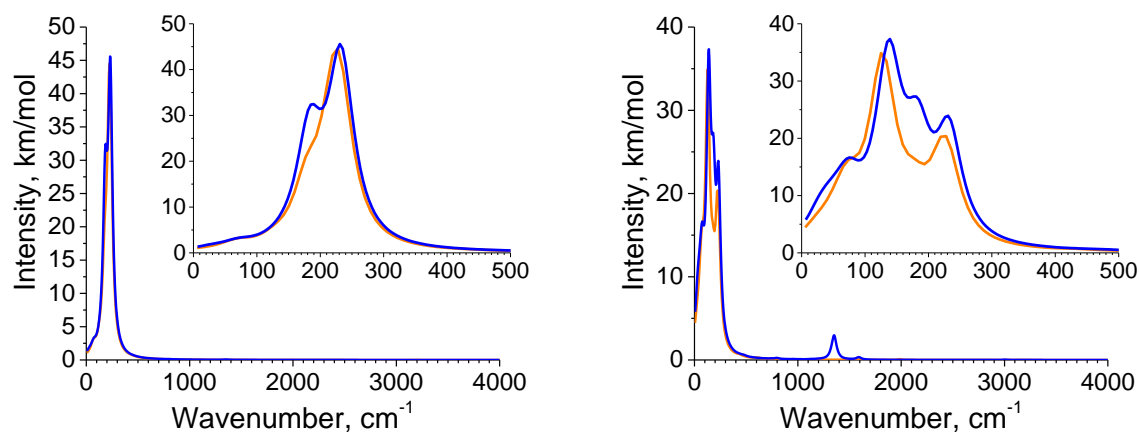

**Figure S13.** Calculated partial IR spectra of  $[\text{H}_3\text{L}][\text{MnBr}_4][\text{H}_2\text{O}]$  fragments of **1** in global (orange) and local (blue) minima for manganese(II) ion (left) and four bromides (right).

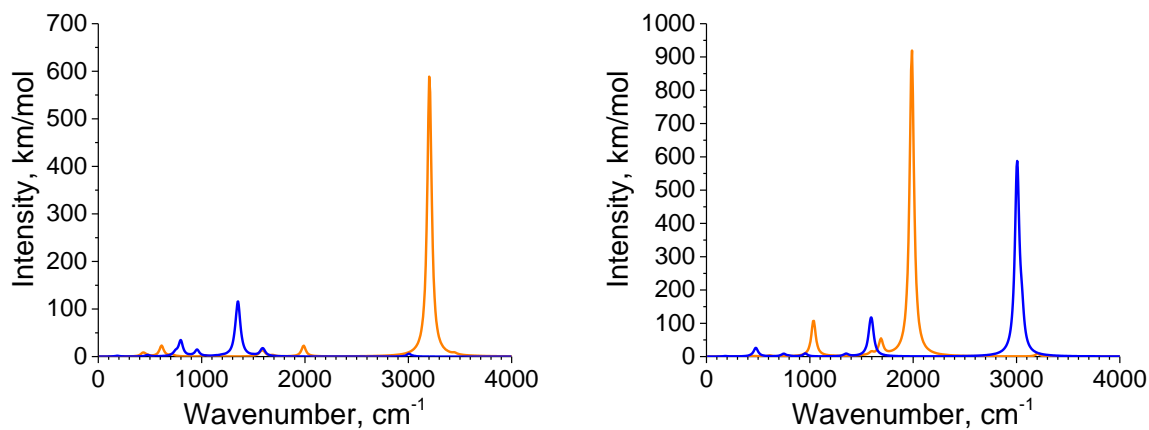

**Figure S14.** Calculated partial IR spectra of  $[\text{H}_3\text{L}][\text{MnBr}_4][\text{H}_2\text{O}]$  fragments of **1** in global (orange) and local (blue) minima for proton of  $\{\text{Br}\dots\text{HO}\}$  (left) and  $\{\text{O}\dots\text{HO}\}$  (right) fragments.

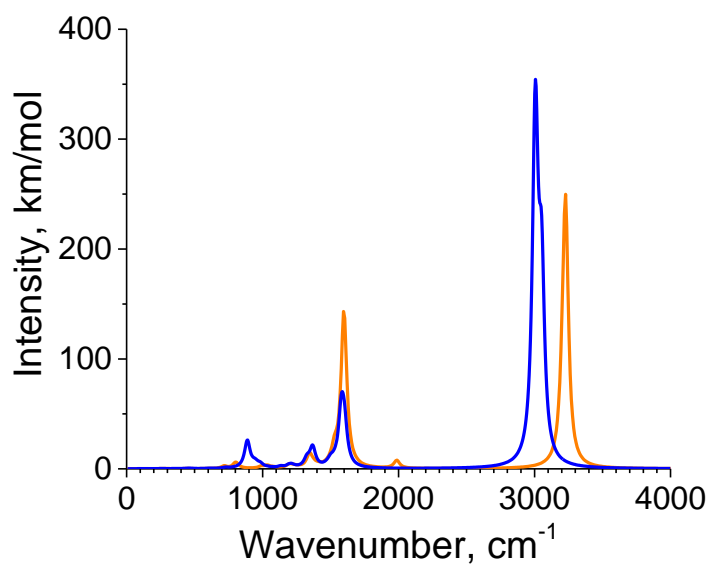

**Figure S15.** Calculated partial IR spectra of  $[\text{H}_3\text{L}][\text{MnBr}_4][\text{H}_2\text{O}]$  fragments of **1** in global (orange) and local (blue) minima for proton of  $\{\text{N}\dots\text{HO}\}$  fragment.

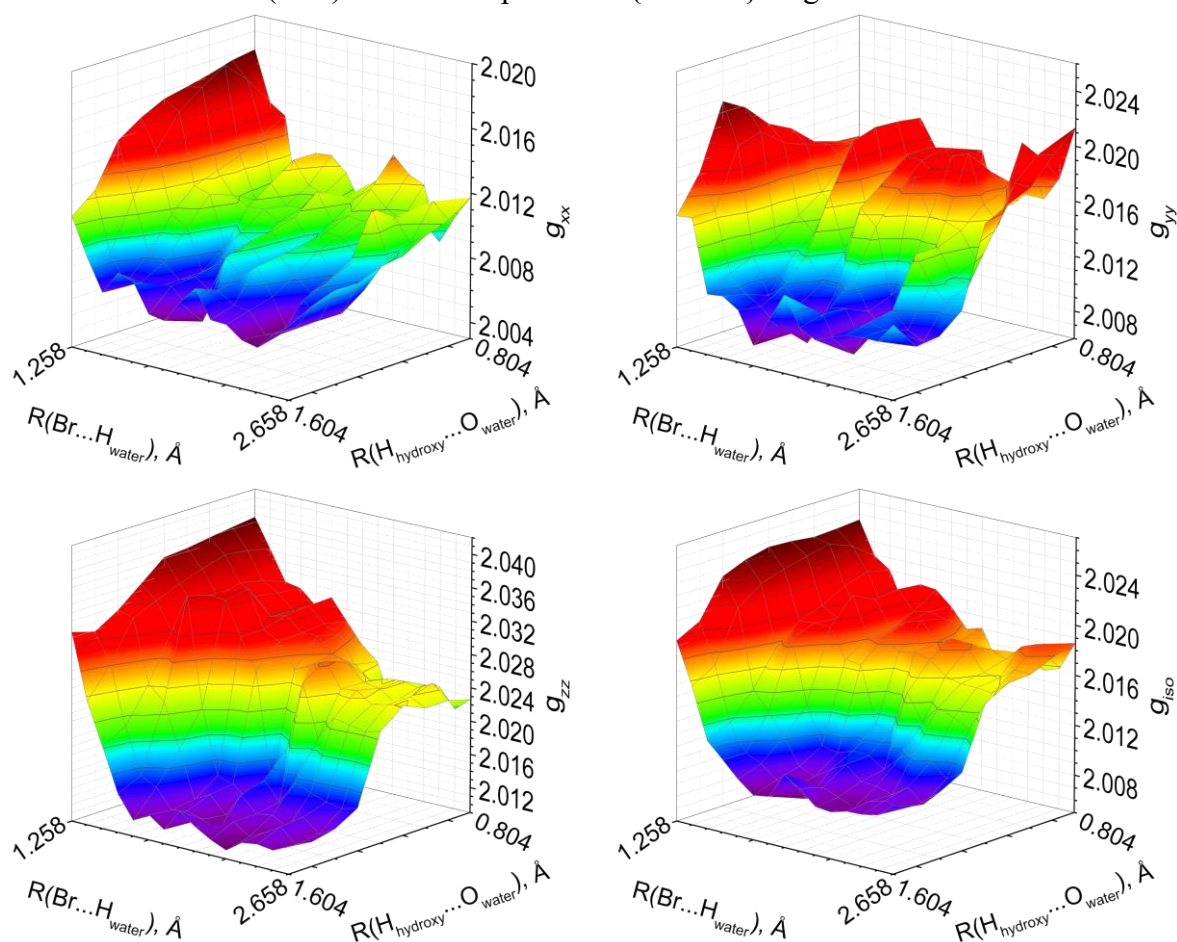

**Figure S16.** Calculated  $\mathbf{g}$ -tensor values along the ground state potential energy surface of **1**.

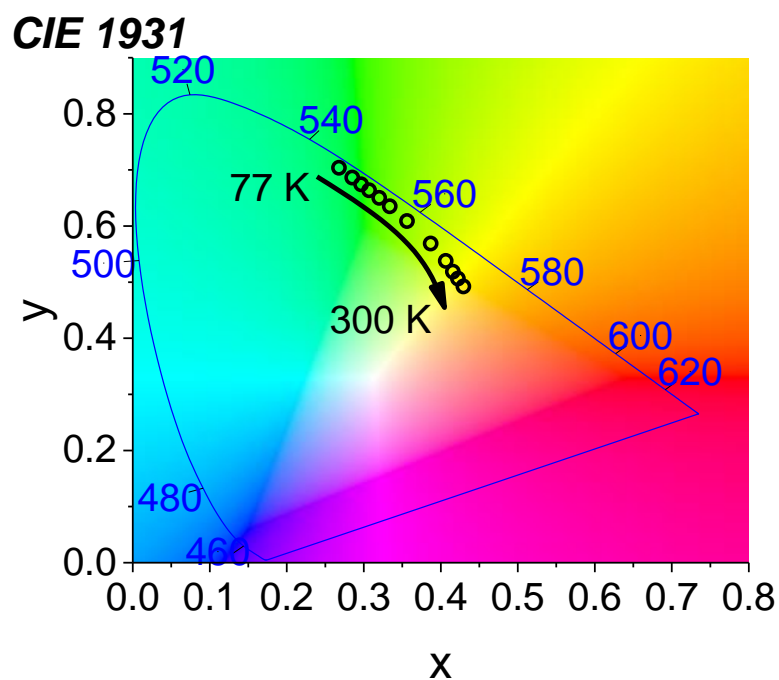

**Figure S17.** Temperature dependences of the photoluminescence chromaticity of **1** ( $\lambda_{\text{Ex}} = 455$  nm).

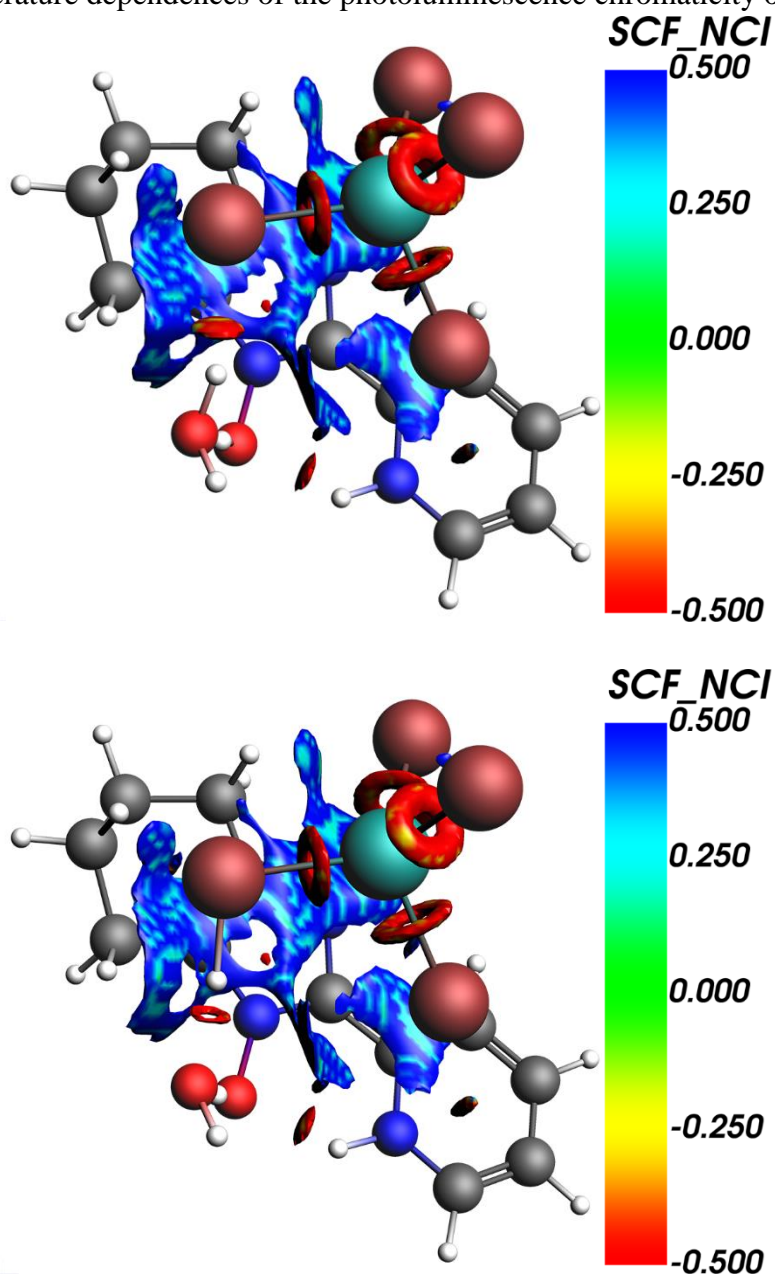

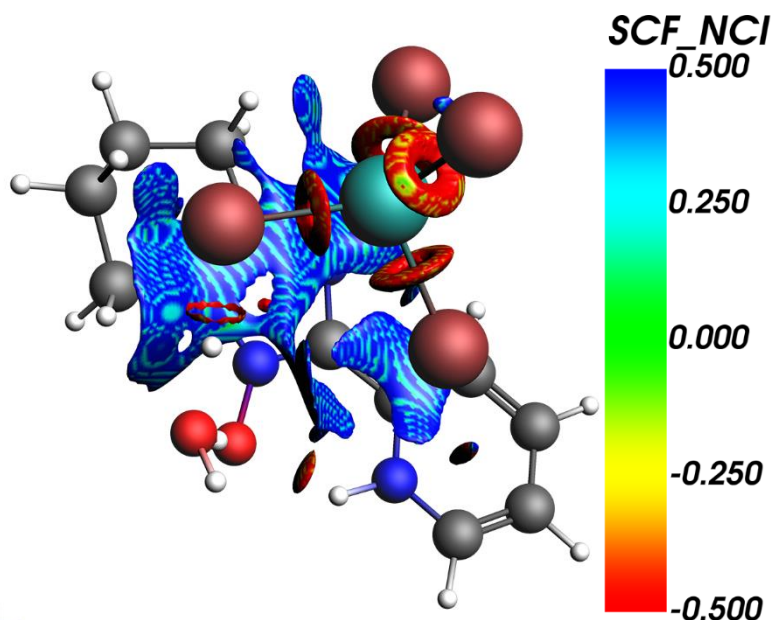

**Figure S18.** The noncovalent interaction (NCI) plots for **1** showing different RH...Br(Mn) interactions. NCIs (SCF density) are presented by isosurfaces ( $s = 0.5$  a.u.,  $\rho = 0.02$  a.u.) colored according to  $\text{sign}(\lambda_2)\rho$  in the red-green-blue scheme (top – global minimum PES, center – local minimum PES, bottom – mediate state between global and local minima PES).

The Hirshfeld surfaces and fingerprint plot were calculated using CrystalExplorer program version 21.5 [1].  
 1. Spackman, P. R., Turner, M. J., McKinnon, J. J., Wolff, S. K., Grimwood, D. J., Jayatilaka, D., Spackman, M. A. CrystalExplorer: a program for Hirshfeld surface analysis, visualization and quantitative analysis of molecular crystals. *J. Appl. Cryst.* **2021**, *54*, 3, 1006–1011, doi: 10.1107/S1600576721002910.

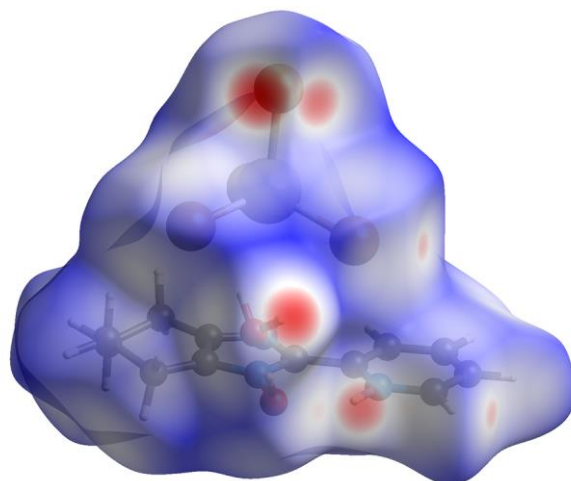

**Figure S19.** The Hirshfeld surface for the  $[\text{H}_3\text{L}][\text{MnBr}_4][\text{H}_2\text{O}]$  in the crystal **1** mapped with  $d_{\text{norm}}$ .

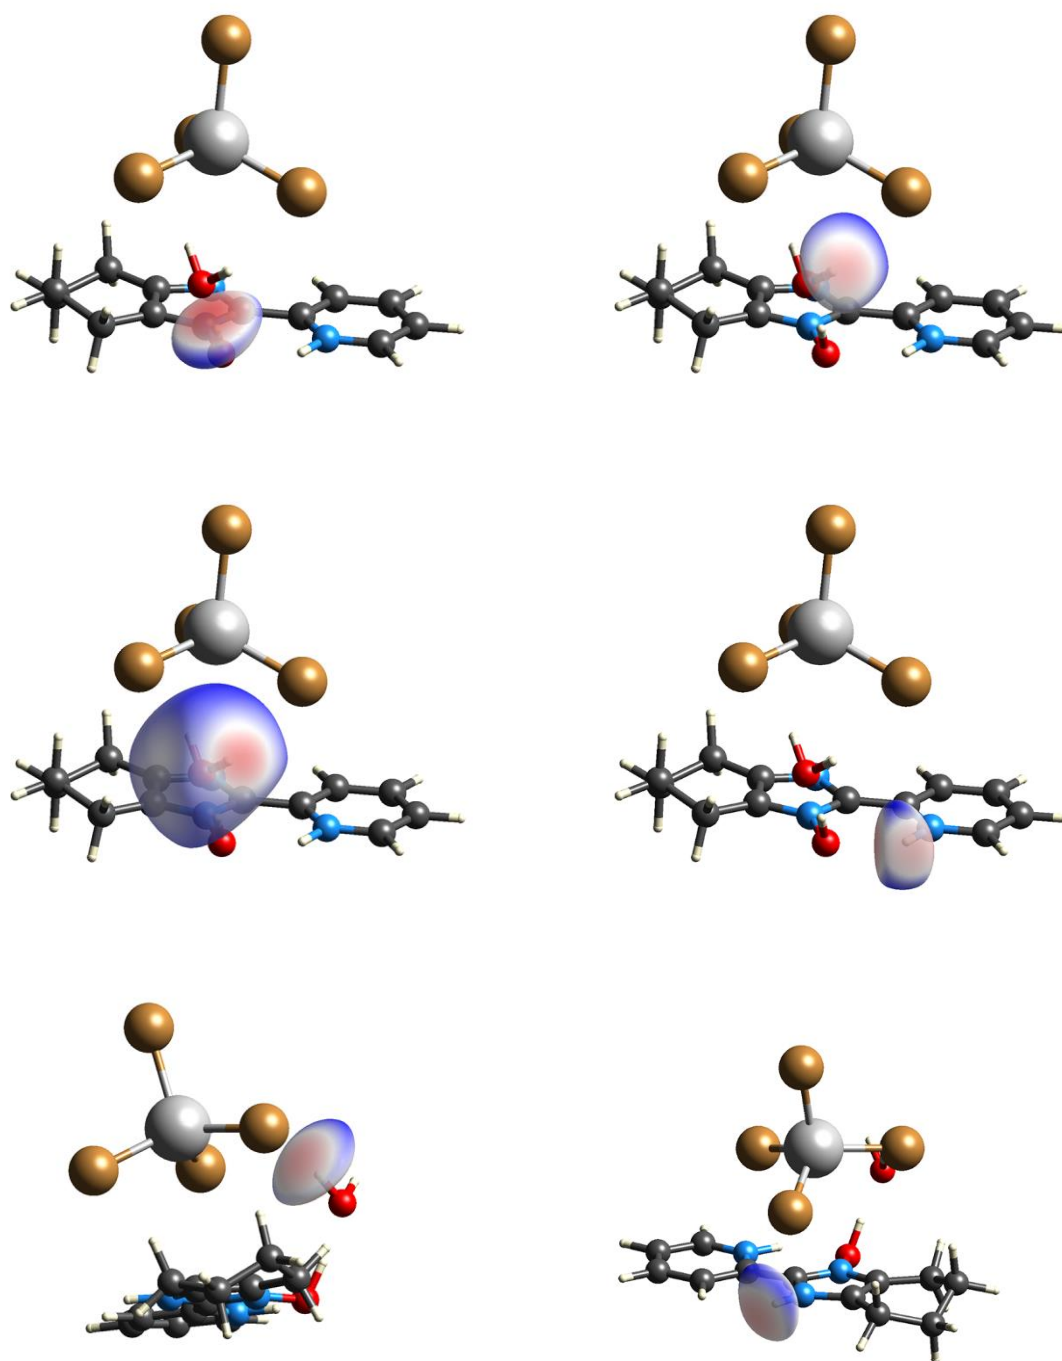

**Figure S20.** The Hirshfeld surfaces for the different protons in the crystal **1** mapped with  $d_{norm}$ .



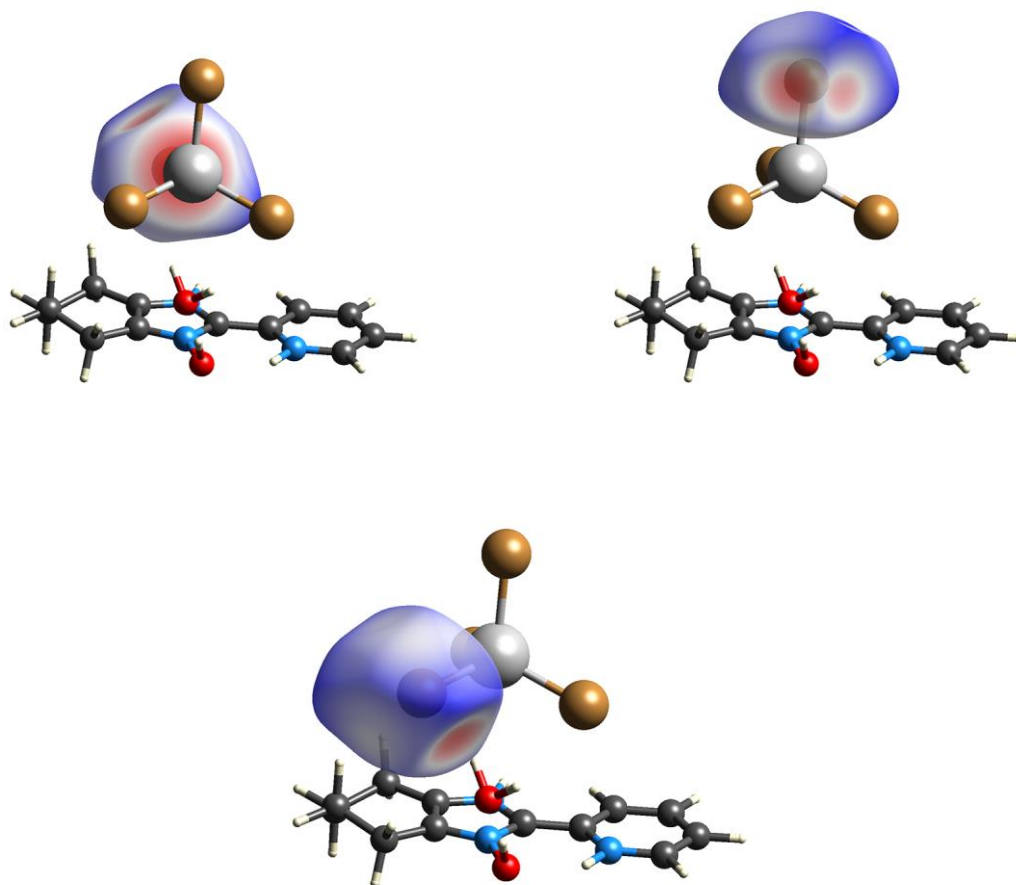

**Figure S21.** The Hirshfeld surfaces for the bromides in the crystal **1** mapped with  $d_{norm}$ .

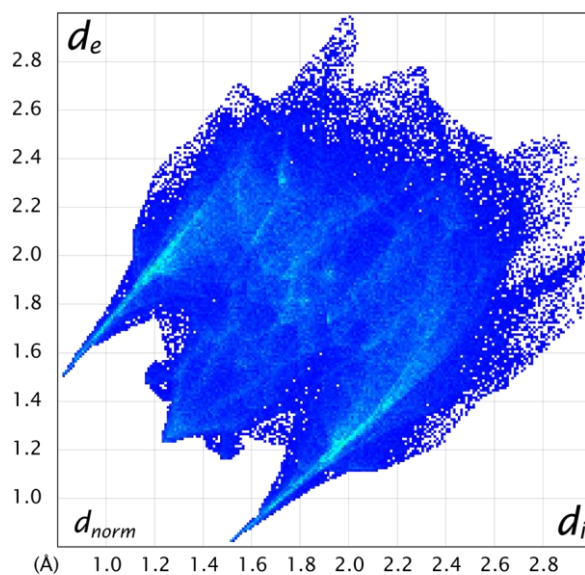

**Figure S22.** Fingerprint plot for the  $[H_3L][MnBr_4][H_2O]$  in the crystal **1**. Surface volume is  $481.96 \text{ \AA}^3$ , surface area is  $379.93 \text{ \AA}^2$ , surface asphericity is 0.031, and surface globularity is 0.782.

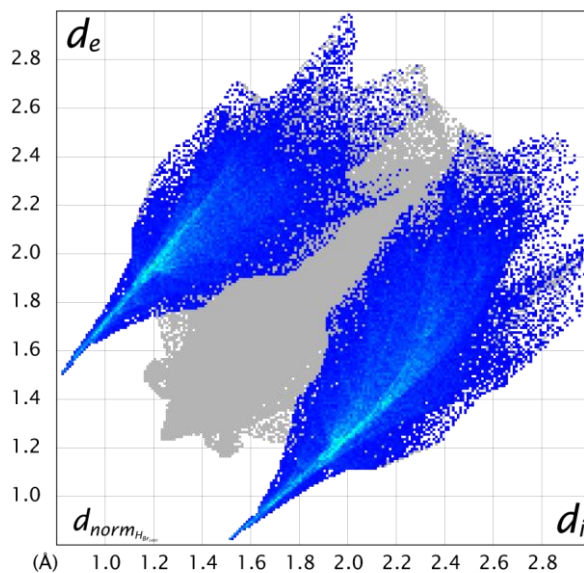

**Figure S23.** Fingerprint plot for the  $[\text{H}_3\text{L}][\text{MnBr}_4][\text{H}_2\text{O}]$  in the crystal **1**. The H...Br close contacts show (surface area – 49.1 %).

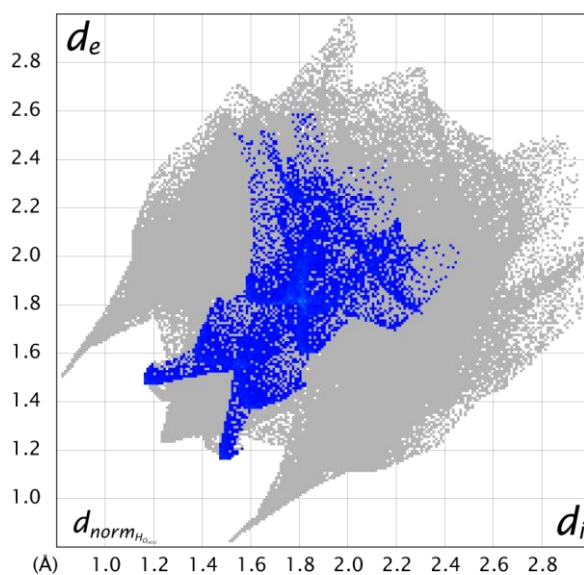

**Figure S24.** Fingerprint plot for the  $[\text{H}_3\text{L}][\text{MnBr}_4][\text{H}_2\text{O}]$  in the crystal **1**. The H...O close contacts show (surface area – 5.2 %).

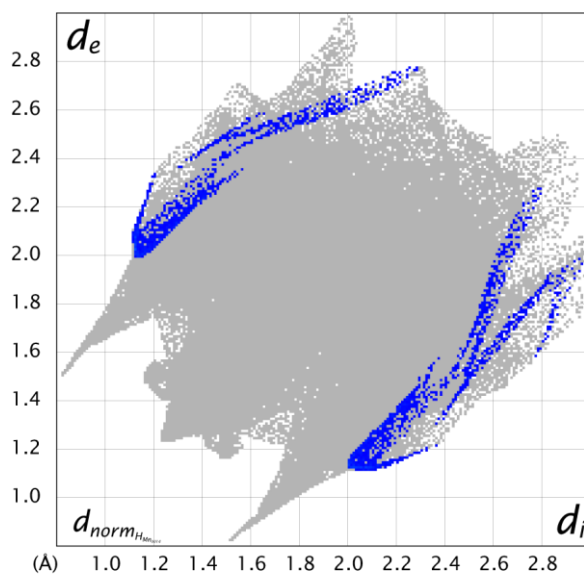



**Figure S25.** Fingerprint plot for the  $[\text{H}_3\text{L}][\text{MnBr}_4][\text{H}_2\text{O}]$  in the crystal **1**. The H...Mn close contacts show (surface area – 1.4 %).

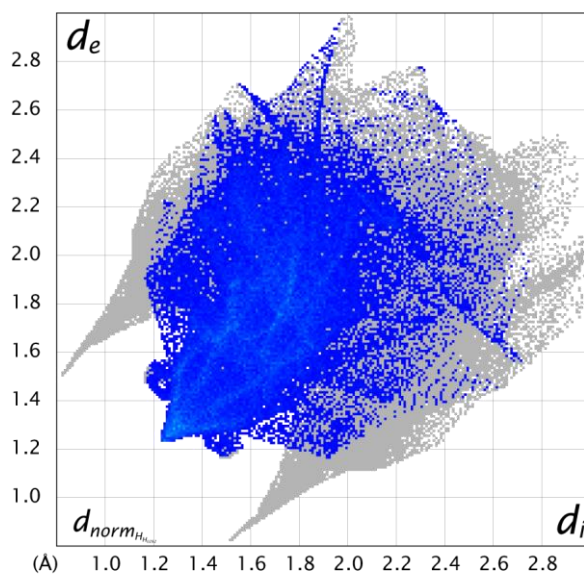

**Figure S26.** Fingerprint plot for the  $[\text{H}_3\text{L}][\text{MnBr}_4][\text{H}_2\text{O}]$  in the crystal **1**. The H...H close contacts show (surface area – 29.2 %).

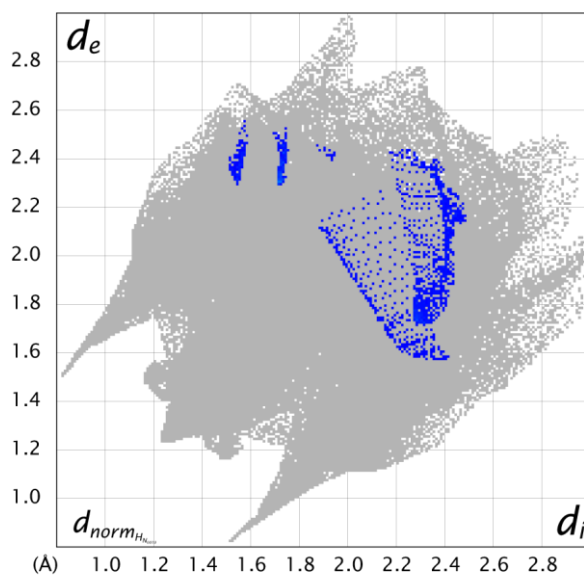

**Figure S27.** Fingerprint plot for the  $[\text{H}_3\text{L}][\text{MnBr}_4][\text{H}_2\text{O}]$  in the crystal **1**. The H...N close contacts show (surface area – 1.0 %).

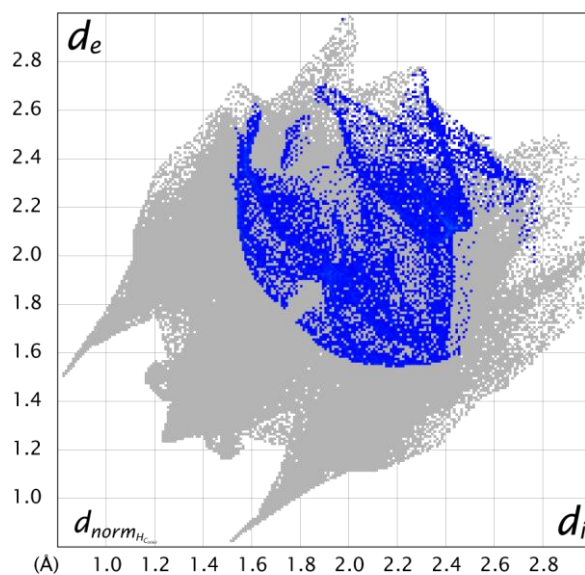

**Figure S28.** Fingerprint plot for the  $[\text{H}_3\text{L}][\text{MnBr}_4][\text{H}_2\text{O}]$  in the crystal **1**. The H...C close contacts show (surface area – 6.3 %).
